# Supplementary material for: Developing a Culturally Sensitive ICF-Based Tool to Describe Functioning of Children with Autism Spectrum Disorder: TEA-CIFunciona Version 1.0 Pilot Study
Source: MDPI journal article supplement (doi:10.3390/ijerph18073720), 2021-04-02
Supplement: s1 [file s1]

**Supplementary Material S1 Examples of Translation Strategies**

| Category Included in TEA-CIFunctiona                                               | Tool                                                                               | Translation into ICF Qualifier                                                     | Considerations                                                                                                       |                                                                                      |
|------------------------------------------------------------------------------------|------------------------------------------------------------------------------------|------------------------------------------------------------------------------------|----------------------------------------------------------------------------------------------------------------------|--------------------------------------------------------------------------------------|
| <b>Functions</b>                                                                   |                                                                                    |                                                                                    |                                                                                                                      |                                                                                      |
| <b>b134</b><br>(sleep functions)                                                   | VAS                                                                                | The score was directly translated into the ICF qualifier                           | A questionnaire related to the category was used as a guide. Then parents were asked to choose a value from the VAS. |                                                                                      |
| <b>0</b>                                                                           | <b>1</b>                                                                           | <b>2</b>                                                                           | <b>3</b>                                                                                                             | <b>4</b>                                                                             |
| None Problem                                                                       | Slight problem                                                                     | Moderate Problem                                                                   | Serious Problem                                                                                                      | Complete Problem                                                                     |
| 0-4%                                                                               | 5-24%                                                                              | 25-49%                                                                             | 50-95%                                                                                                               | 96-100%                                                                              |
|  |  |  |                                   |  |

|                                                                                                 |                               |                                                                                                             |                                                                                                                                                                                                                                                                                 |
|-------------------------------------------------------------------------------------------------|-------------------------------|-------------------------------------------------------------------------------------------------------------|---------------------------------------------------------------------------------------------------------------------------------------------------------------------------------------------------------------------------------------------------------------------------------|
| <b>b1671</b> (expression of language)                                                           | VABS<br>(Subdomain receptive) | We translated the adaptive level using v-Scale into ICF Qualifiers                                          | When the scoring was >12 the qualifier 0 was assigned; with a score 10–12, the qualifier assigned was 1; a score 6–9 received a qualifier 2; if a score 3–5 was given, the qualifier assigned was 3; and with score <3 a qualifier 4.                                           |
| <b>b7653</b> (functions related to involuntary movements. Stereotypies and motor perseveration) | ADI-R (item 78)               | Following Translational strategies, the professional rated item 78 and translated it into the ICF qualifier | When the scoring was 0, the qualifier 0 was assigned; with a score 1, the qualifier assigned was 1; with a score 2 a qualifier 2. If a score of 3 was given on the scale, the researcher decided by clinical judgment if the category represented a severe or complete problem. |
| (a)                                                                                             |                               |                                                                                                             |                                                                                                                                                                                                                                                                                 |

### Activities and Participation

|                                           |                                   |                                                                                                             |                                                                                                                                                                                                                                                                     |
|-------------------------------------------|-----------------------------------|-------------------------------------------------------------------------------------------------------------|---------------------------------------------------------------------------------------------------------------------------------------------------------------------------------------------------------------------------------------------------------------------|
| <b>d155</b> (acquiring skills)            | VABS (Domain Daily Living Skills) | We translated the adaptive level using Standard Score into ICF Qualifiers                                   | The scoring was as follows: >86, the qualifier 0 was assigned; score 71–85, received a qualifier 1; with a score 51–70 a qualifier 2 was assigned; when the score was 35–50, the qualifier 3 was assigned; and a score <35 a qualifier 4.                           |
| <b>d250</b> (managing one's own behavior) | CARS (item 6)                     | The professional rated item 6 and translated it to the ICF qualifier following the Translational strategies | When the scoring was 1, the qualifier 0 was assigned; when the score was 2, the qualifier assigned was 1; score 3 received qualifier 2; and when score was 4, the researcher decided by clinical judgment if the category represented a severe or complete problem. |
| <b>d330</b> (speaking)                    | Observation/Interview             | The professional rated the category following ADOS guideline                                                | Non echoed phrases speech: 0<br>Echoed phrases, stereotyped utterances with other flexible spontaneous language: 1<br>Single words mostly: 2<br>No spoken language OR only speech without communicative intent: Up to 5 years, 11 months: 3- >6 years old: 4        |
| <b>d815</b> (preschool education)         | VAS                               | The score was directly translated into the ICF qualifier                                                    | A questionnaire related to the category was used as a guide. Then parents were asked to choose a value from the VAS.                                                                                                                                                |

| 0                                                                                 | 1                                                                                 | 2                                                                                 | 3                                                                                  | 4                                                                                   |
|-----------------------------------------------------------------------------------|-----------------------------------------------------------------------------------|-----------------------------------------------------------------------------------|------------------------------------------------------------------------------------|-------------------------------------------------------------------------------------|
| No Difficulty                                                                     | Mild Difficulty                                                                   | Moderate Difficulty                                                               | Severe Difficulty                                                                  | Complete Difficulty                                                                 |
| 0-4%                                                                              | 5-24%                                                                             | 25-49%                                                                            | 50-95%                                                                             | 96-100%                                                                             |
|  |  |  |  |  |

(b)

**Environmental Factors**

|                                                                 |           |                                                                                                |                                                                                                                      |
|-----------------------------------------------------------------|-----------|------------------------------------------------------------------------------------------------|----------------------------------------------------------------------------------------------------------------------|
| e125 (products and technology for communication)                | Interview | The professional defined a facilitator or a barrier according to his or her clinical judgement | Levels of severity were expressed in % as defined in the ICF generic scale                                           |
| e355 (Individual attitudes of people in positions of authority) | VAS       | The score was directly translated into the ICF qualifier                                       | A questionnaire related to the category was used as a guide. Then parents were asked to choose a value from the VAS. |

| -4                                                                                  | -3                                                                                  | -2                                                                                  | -1                                                                                  | 0                                                                                   | +1                                                                                   | +2                                                                                    | +3                                                                                    | +4                                                                                    |
|-------------------------------------------------------------------------------------|-------------------------------------------------------------------------------------|-------------------------------------------------------------------------------------|-------------------------------------------------------------------------------------|-------------------------------------------------------------------------------------|--------------------------------------------------------------------------------------|---------------------------------------------------------------------------------------|---------------------------------------------------------------------------------------|---------------------------------------------------------------------------------------|
| Total Barrier                                                                       | Severe Barrier                                                                      | Moderate Barrier                                                                    | Mild Barrier                                                                        | No Facilitator/<br>no Barrier                                                       | Mild Facilitator                                                                     | Moderate Facilitator                                                                  | Substantial Facilitator                                                               | Complete Facilitator                                                                  |
|  |  |  |  |  |  |  |  |  |

(c)
